# Supplementary material for: Ultrasound-derived fat fraction and automated point shear-wave elastography in diagnosing intrahepatic cholestasis of pregnancy and preeclampsia
Source: Research Square preprint supplement (doi:10.21203/rs.3.rs-8234176/v1), 2025-12-16
Supplement: Supplementary file 1 [file 8af7ec775e2d05ceb23c7da3.docx]

**Table S1 ROC Optimal Cutoff Results**

|  | | | | | |
| --- | --- | --- | --- | --- | --- |
|  | AUC | Optimal Cutoff Point | Sensitivity | Specificity | Cutoff Point |
| UDFF(%) | 0.896 | 0.633 | 0.700 | 0.933 | 6.541 |
| Auto pSWE | 0.758 | 0.533 | 0.600 | 0.933 | 7.347 |

**Table S2 Regression Analysis of UDFF and Auto pSWE Data Between the Severe PE Group and the Control Group**

|  | | | | | | | |
| --- | --- | --- | --- | --- | --- | --- | --- |
|  | Regression Coefficient | Standard Error | z-value | Wald Chi-Square | *P-value* | Odds Ratio | 95% Confidence Interval for the Odds Ratio |
| UDFF(%) | 1.357 | 0.424 | 3.199 | 10.232 | 0.001 | 3.884 | 1.691 ~ 8.919 |
| Auto pSWE | 0.461 | 0.217 | 2.129 | 4.531 | 0.033 | 1.586 | 1.037 ~ 2.425 |
| Intercept | -11.717 | 3.124 | -3.750 | 14.062 | 0.000 | 0.000 | 0.000 ~ 0.004 |
|  | | | | | | | |

**Table S3 ROC Optimal Cutoff Results**

|  | | | | | |
| --- | --- | --- | --- | --- | --- |
|  | AUC | Optimal Cutoff Point | Sensitivity | Specificity | Cutoff Point |
| UDFF | 0.930 | 0.733 | 0.767 | 0.967 | 6.734 |
| Auto pSWE | 0.827 | 0.533 | 0.633 | 0.900 | 7.471 |
